# Supplementary material for: Simultaneous manipulation of ion doping and cocatalyst loading into Mn0.3Cd0.7S nanorods toward significantly improved H2evolution
Source: Royal Society of Chemistry journal article supplement (doi:10.1039/d0cy00095g), 2020-01-01
Supplement: d0cy00095g1.pdf [file d0cy00095g1.pdf]

## Supporting Information

# Simultaneous Manipulation of Ion Doping and Cocatalyst Loading in $\text{Mn}_{0.3}\text{Cd}_{0.7}\text{S}$ Nanorods toward Significantly Improved $\text{H}_2$ Evolution

Yanling Han, Xinfang Dong\*

Guangdong Provincial Key Lab of Green Chemical Product Technology, School of Chemistry and Chemical Engineering, South China University of Technology, Guangzhou 510640, P.R. China.

\*Corresponding author. Tel: +86 20 87110659; E-mail: cexfdong@scut.edu.cn.

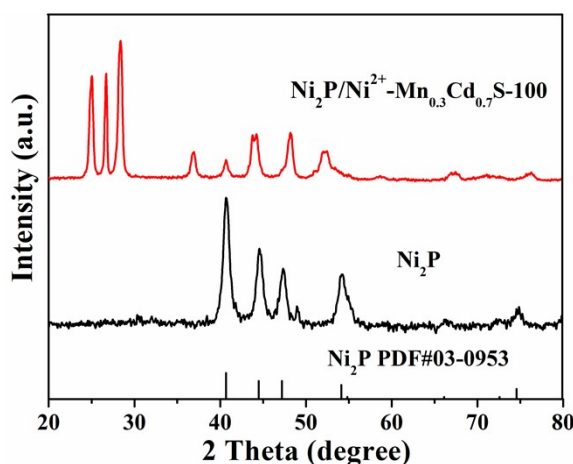

Fig. S1. XRD pattern of sample.

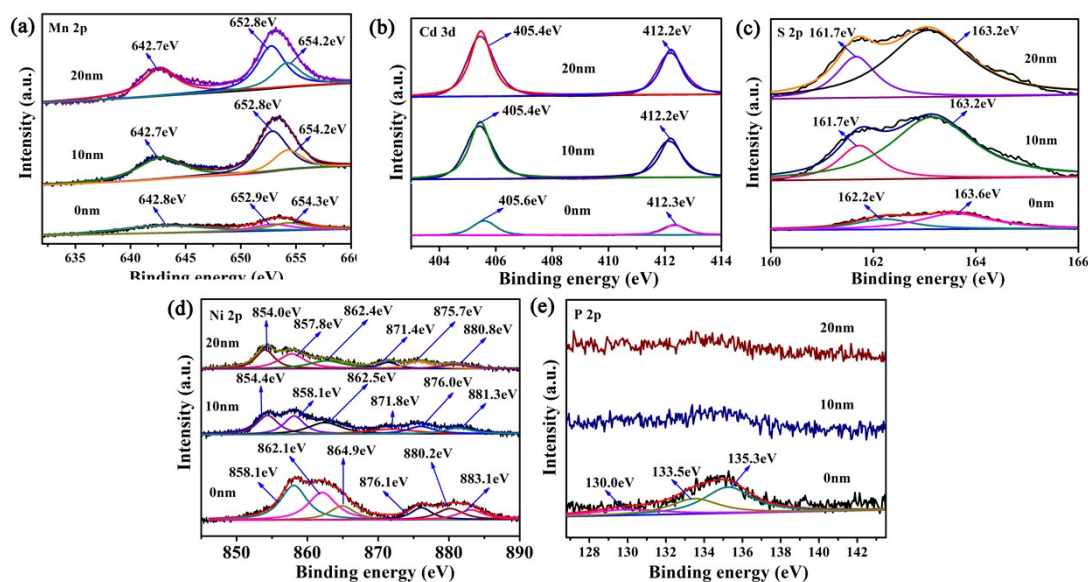

Fig. S2. XPS spectra of (a) Mn 2p, (b) Cd 3d, (c) S 2p, (d) Ni 2p, (e) P 2p of  $\text{Ni}_2\text{P}/\text{Ni}^{2+}\text{-Mn}_{0.3}\text{Cd}_{0.7}\text{S-10}$  at different etching depth.

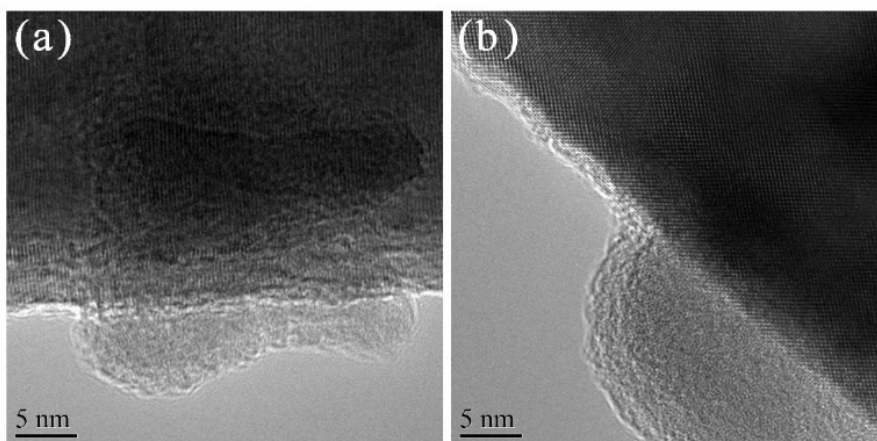

**Fig. S3.** TEM images of (a, b)  $\text{Ni}_2\text{P}/\text{Ni}^{2+}\text{-Mn}_{0.3}\text{Cd}_{0.7}\text{S-10}$ .

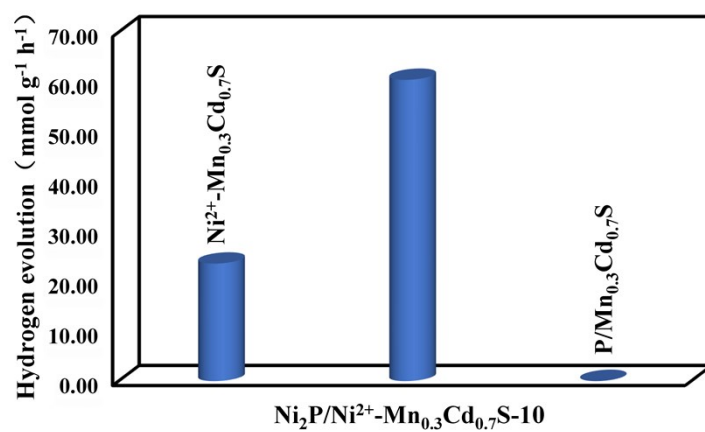

**Fig. S4.**  $\text{H}_2$  evolution rate of composites.

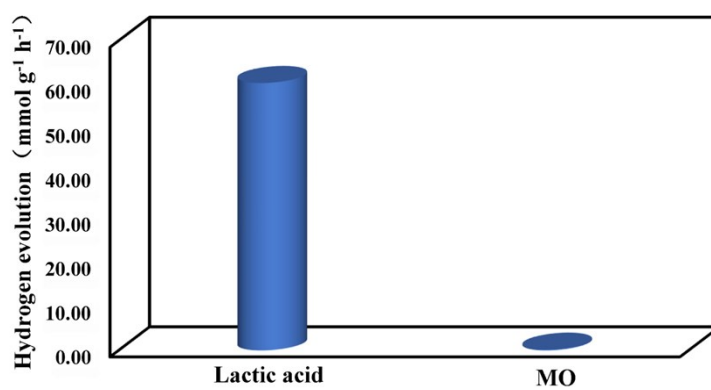

**Fig. S5.** The  $\text{H}_2$  evolution rate of  $\text{Ni}_2\text{P}/\text{Ni}^{2+}\text{-Mn}_{0.3}\text{Cd}_{0.7}\text{S-10}$  in different sacrifice reagent.

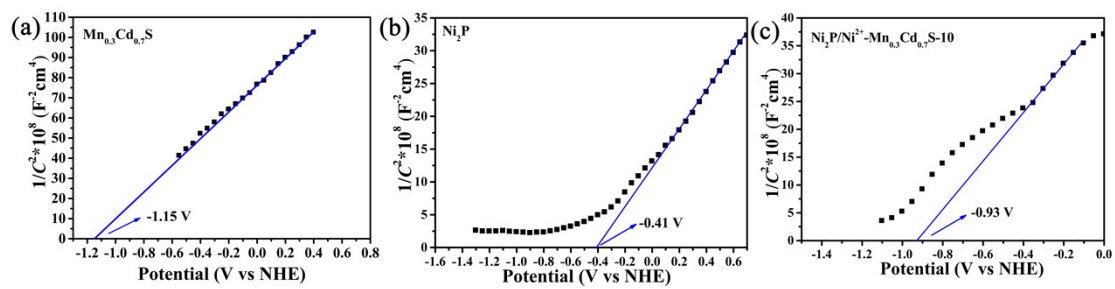

**Fig. S6.** Mott-Schottky plots of (a)  $\text{Mn}_{0.3}\text{Cd}_{0.7}\text{S}$ , (b)  $\text{Ni}_2\text{P}$  and (c)  $\text{Ni}_2\text{P/Ni}^{2+}\text{-Mn}_{0.3}\text{Cd}_{0.7}\text{S-10}$ .
